# Supplementary material for: Efficacy of Dietary Lipid Control in Healing High-Fat and High-Cholesterol Diet-Induced Fibrotic Steatohepatitis in Rats
Source: PubMed Central journal article supplement (PMC4699821; doi:10.1371/journal.pone.0145939), 2016-01-04
Supplement: pone.0145939.s001.pdf [file pone.0145939.s001.pdf]

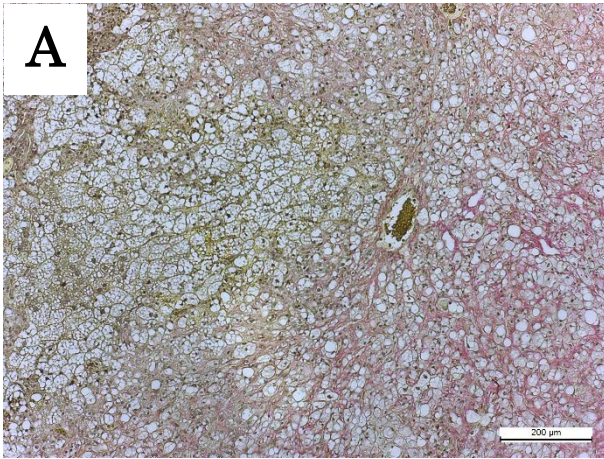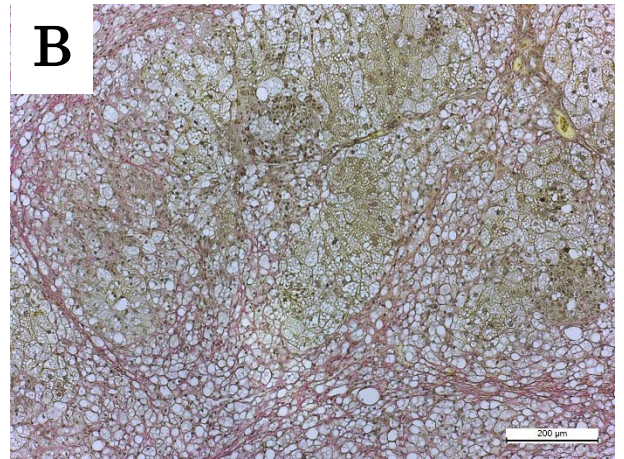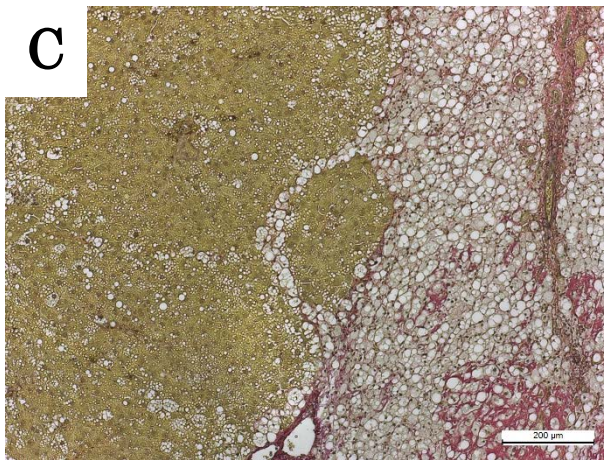

**S1 Fig. EVG staining of liver in rats of HFC and HFC/control group**
